# Supplementary material for: Efficacy of Levamisole with Standard Care Treatment vs Standard Care in Clinical Presentations of Non-Hospitalized Patients with COVID-19: A Randomized Clinical Trial
Source: Research Square preprint supplement (doi:10.21203/rs.3.rs-964097/v1), 2021-11-15
Supplement: Supplementary file 1 [file 59a9555a7e3593ea18e210f1.docx]

Supplementary File1- Secondary Outcomes in a Study of the Effect of Levamisole on Non-Hospitalized Patients with Coronavirus Disease 2019 (COVID-19)

| Clinical Presentation | Control group | Intervention group | P value |
| --- | --- | --- | --- |
| Fever, No (%) |  |  |  |
| Day 1 | 84 (48.3) | 91 (49.2) | 0.863 |
| Day 3 | 63 (36.2) | 35 (19.2) | 0.000 |
| Day 5 | 35 (20.2) | 19 (10.4) | 0.010 |
| Day 7 | 9 (5.2) | 5 (2.7) | 0.231 |
| Day 9 | 2 (1.2) | 2 (1.1) | 1.000 |
| Day 14 | 1 (0.6) | 2 (1.1) | 1.000 |
| Chills, No (%) |  |  |  |
| Day 1 | 47 (27.0) | 64 (34.6) | 0.120 |
| Day 3 | 36 (20.8) | 27 (14.8) | 0.141 |
| Day 5 | 17 (9.8) | 10 (5.5) | 0.124 |
| Day 7 | 3 (1.7) | 4 (2.2) | 1.000 |
| Day 9 | 2 (1.2) | 2 (1.1) | 1.000 |
| Day 14 | 1 (0.6) | 1 (0.5) | 1.000 |
| Cough, No (%) |  |  |  |
| Day 1 | 71 (40.8) | 100 (54.1) | 0.012 |
| Day 3 | 65 (37.4) | 77 (42.3) | 0.340 |
| Day 5 | 52 (30.1) | 57 (31.3) | 0.797 |
| Day 7 | 45 (26.0) | 34 (18.7) | 0.097 |
| Day 9 | 28 (16.2) | 19 (10.4) | 0.110 |
| Day 14 | 12 (6.9) | 13 (7.1) | 0.962 |
| Fatigue, No (%) |  |  |  |
| Day 1 | 86 (49.4) | 98 (53.0) | 0.502 |
| Day 3 | 70 (40.2) | 71 (39.0) | 0.814 |
| Day 5 | 52 (30.1) | 44 (24.2) | 0.212 |
| Day 7 | 46 (26.6) | 32 (17.6) | 0.040 |
| Day 9 | 33 (19.1) | 22 (12.1) | 0.069 |
| Day 14 | 21 (12.1) | 12 (6.5) | 0.067 |
| Headache, No (%) |  |  |  |
| Day 1 | 57 (32.8) | 74 (40.0) | 0.154 |
| Day 3 | 50 (28.7) | 54 (29.7) | 0.846 |
| Day 5 | 36 (20.8) | 27 (14.8) | 0.141 |
| Day 7 | 26 (15.0) | 10 (5.5) | 0.003 |
| Day 9 | 16 (9.2) | 5 (2.7) | 0.009 |
| Day 14 | 10 (5.8) | 3 (1.6) | 0.036 |
| Myalgia, No (%) |  |  |  |
| Day 1 | 83 (48.0) | 92 (49.7) | 0.740 |
| Day 3 | 72 (41.4) | 66 (36.3) | 0.322 |
| Day 5 | 55 (31.8) | 45 (24.7) | 0.139 |
| Day 7 | 37 (21.4) | 16 (8.8) | 0.001 |
| Day 9 | 18 (10.4) | 7 (3.8) | 0.016 |
| Day 14 | 9 (5.2) | 3 (1.6) | 0.061 |
| Sore throat, No (%) |  |  |  |
| Day 1 | 51 (29.3) | 57 (30.8) | 0.757 |
| Day 3 | 35 (20.1) | 26 (14.3) | 0.145 |
| Day 5 | 19 (11.0) | 18 (9.9) | 0.736 |
| Day 7 | 12 (6.9) | 11 (6.0) | 0.733 |
| Day 9 | 8 (4.6) | 8 (4.4) | 0.917 |
| Day 14 | 3 (1.7) | 4 (2.2) | 1.000 |
| Rhinorrhea, No (%) |  |  |  |
| Day 1 | 19 (10.9) | 27 (14.6) | 0.288 |
| Day 3 | 11 (6.3) | 11 (6.0) | 0.913 |
| Day 5 | 7 (4.0) | 4 (2.2) | 0.320 |
| Day 7 | 3 (1.7) | 1 (0.5) | 0.361 |
| Day 9 | 1 (0.6) | 1 (0.5) | 1.000 |
| Day 14 | 1 (0.6) | 2 (1.1) | 1.000 |
| Dyspnea, No (%) |  |  |  |
| Day 1 | 19 (10.9) | 12 (6.5) | 0.135 |
| Day 3 | 14 (8.0) | 10 (5.5) | 0.337 |
| Day 5 | 2 (1.2) | 6 (3.3) | 0.174 |
| Day 7 | 3 (1.7) | 5 (2.7) | 0.724 |
| Day 9 | 1 (0.6) | 3 (1.6) | 0.623 |
| Day 14 | 1 (0.6) | 1 (0.5) | 1.000 |
| Anorexia, No (%) |  |  |  |
| Day 1 | 30 (17.2) | 33 (17.8) | 0.882 |
| Day 3 | 23 (13.2) | 32 (17.6) | 0.255 |
| Day 5 | 21 (12.1) | 13 (7.1) | 0.110 |
| Day 7 | 14 (8.1) | 8 (4.4) | 0.149 |
| Day 9 | 7 (4.0) | 4 (2.2) | 0.315 |
| Day 14 | 4 (2.3) | 1 (0.5) | 0.201 |
| Nausea, No (%) |  |  |  |
| Day 1 | 25 (14.4) | 15 (8.1) | 0.060 |
| Day 3 | 22 (12.6) | 15 (8.2) | 0.174 |
| Day 5 | 9 (5.2) | 13 (7.1) | 0.488 |
| Day 7 | 4 (2.3) | 6 (3.3) | 0.751 |
| Day 9 | 4 (2.3) | 2 (1.1) | 0.438 |
| Day 14 | 0 (0.0) | 1 (0.5) | 1.000 |
| Vomiting, No (%) |  |  |  |
| Day 1 | 11 (6.3) | 5 (2.7) | 0.097 |
| Day 3 | 4 (2.3) | 0 (0.0) | 0.056 |
| Day 5 | 1 (0.6) | 0 (0.0) | 0.487 |
| Day 7 | 0 (0.0) | 0 (0.0) | - |
| Day 9 | 0 (0.0) | 0 (0.0) | - |
| Day 14 | 0 (0.0) | 0 (0.0) | - |
| Diarrhea, No (%) |  |  |  |
| Day 1 | 16 (9.2) | 17 (9.2) | 0.998 |
| Day 3 | 10 (5.7) | 8 (4.4) | 0.561 |
| Day 5 | 3 (1.7) | 1 (0.5) | 0.361 |
| Day 7 | 1 (0.6) | 1 (0.5) | 1.000 |
| Day 9 | 1 (0.6) | 0 (0.0) | 0.487 |
| Day 14 | 1 (0.6) | 1 (0.5) | 1.000 |
| Hyposmia, No (%) |  |  |  |
| Day 1 | 18 (10.3) | 27 (14.6) | 0.224 |
| Day 3 | 17 (9.8) | 26 (12.3) | 0.191 |
| Day 5 | 15 (8.7) | 18 (9.9) | 0.692 |
| Day 7 | 16 (9.2) | 12 (6.6) | 0.354 |
| Day 9 | 13 (7.6) | 8 (4.4) | 0.208 |
| Day 14 | 8 (4.6) | 4 (2.2) | 0.199 |
| Dysgeusia, No (%) |  |  |  |
| Day 1 | 18 (10.3) | 28 (15.1) | 0.157 |
| Day 3 | 18 (10.3) | 28 (15.4) | 0.156 |
| Day 5 | 16 (9.2) | 20 (11.0) | 0.587 |
| Day 7 | 15 (8.7) | 10 (5.5) | 0.242 |
| Day 9 | 14 (8.1) | 8 (4.4) | 0.149 |
| Day 14 | 5 (2.9) | 6 (3.3) | 0.839 |
| Hospital admission, No (%) | 4 (2.2) | 2 (1.1) | 0.444 |
| Time between symptom onset and hospitalization, median (IQR), d | 9.50 (8.00-9.50) | 7.00 (7.00-7.00) | 0.102 |
